# Supplementary material for: Phenotypic Analysis of Hematopoietic Stem and Progenitor Cell Populations in Acute Myeloid Leukemia Based on Spectral Flow Cytometry, a 20-Color Panel, and Unsupervised Learning Algorithms
Source: MDPI journal article supplement (doi:10.3390/ijms25052847), 2024-02-29

## Supplementary Material

**Table S1:** Patient characteristics

BM samples from 41 patients were used for this study and analyzed by the Routine Diagnostics laboratory. CD34pos HSPCs were determined (% of CD34pos HSPCs/Leukocytes) and percentages of CD19pos and myeloid HSPC subpopulations determined. In Case 6 (monoblastic AML) the leukemic blast population was CD34neg. MRD status was reported according to ELN guidelines. The results of the MRD analysis with the 20-Color panel on the spectral cytometer are also given and discussed in the text of the Results section.

| Table S1 |                         | Routine Diagnostics |         |         |                           | 20-color panel |         |
|----------|-------------------------|---------------------|---------|---------|---------------------------|----------------|---------|
|          |                         | HSPCs               | Myeloid | CD19pos | MRD status                | Age            |         |
|          |                         | %                   | %       | %       | by routine flow cytometry |                |         |
| 1        | AML, diagnosis          | 75.0                | 99.0    | 1.0     |                           | 78             |         |
| 2        | AML, diagnosis          | 47.0                | 100.0   | 0.0     |                           | 80             |         |
| 3        | AML, diagnosis          | 53.0                | 98.0    | 2.0     |                           | 67             |         |
| 4        | AML, diagnosis          | 91.0                | 100.0   | 0.0     |                           | 66             |         |
| 5        | AML, diagnosis          | 64.0                | 100.0   | 0.0     |                           | 17             |         |
| 6        | AML, diagnosis          | 0.1                 | 100.0   | 0.0     |                           | 76             |         |
| 7        | AML, diagnosis          | 28.0                | 98.0    | 2.0     |                           | 74             |         |
| 8        | AML, Post therapy       | 0.3                 | 88.0    | 12.0    | MRD neg                   | 74             | MRD neg |
| 9        | AML, Post therapy       | 0.2                 | 94.0    | 6.0     | MRD neg                   | 64             | MRD neg |
| 10       | AML, Post therapy       | 0.5                 | 47.0    | 53.0    | MRD neg                   | 71             | MRD neg |
| 11       | AML, Post therapy       | 0.5                 | 83.0    | 17.0    | MRD neg                   | 46             | MRD neg |
| 12       | AML, Post therapy       | 0.3                 | 65.0    | 35.0    | MRD neg                   | 63             | MRD neg |
| 13       | AML, Post therapy       | 1.6                 | 27.0    | 73.0    | MRD neg                   | 49             | MRD neg |
| 14       | AML, Post therapy       | 0.1                 | 100.0   | 0.0     | MRD neg                   | 56             | MRD neg |
| 15       | AML, Post therapy       | 0.3                 | 95.0    | 5.0     | MRD neg                   | 70             | MRD neg |
| 16       | AML, Post therapy       | 0.5                 | 70.0    | 30.0    | MRD neg                   | 36             | MRD neg |
| 17       | AML, Post therapy       | 0.5                 | 53.0    | 47.0    | MRD neg                   | 20             | MRD neg |
| 18       | AML, Post therapy       | 0.6                 | 99.0    | 1.0     | MRD neg                   | 50             | MRD neg |
| 19       | AML, Post therapy       | 1.0                 | 78.0    | 22.0    | MRD neg                   | 55             | MRD neg |
| 20       | AML, Post therapy       | 0.3                 | 72.0    | 28.0    | MRD neg                   | 62             | MRD neg |
| 21       | AML, Post therapy       | 0.2                 | 60.0    | 40.0    | MRD neg                   | 71             | MRD neg |
| 22       | AML, Post therapy       | 3.7                 | 88.0    | 12.0    | MRD neg                   | 52             | MRD neg |
| 23       | AML, Post therapy       | 0.5                 | 100.0   | 0.0     | MRD neg                   | 69             | MRD pos |
| 24       | AML, Post therapy       | 1.1                 | 98.0    | 2.0     | MRD pos                   | 81             | MRD pos |
| 25       | AML, Post therapy       | 6.0                 | 98.0    | 2.0     | MRD pos                   | 74             | MRD pos |
| 26       | AML, Post therapy       | 30.0                | 95.0    | 5.0     | MRD pos                   | 77             | MRD pos |
| 27       | CMML                    | 1.9                 | 100.0   | 0.0     |                           | 66             |         |
| 28       | MDS/MPS                 | 0.4                 | 100.0   | 0.0     |                           | 74             |         |
| 29       | MDS/AML                 | 6.9                 | 100.0   | 0.0     |                           | 75             |         |
| 30       | MGUS                    | nd                  |         |         |                           | 78             |         |
| 31       | Multiple Myeloma        | nd                  |         |         |                           | 73             |         |
| 32       | Multiple Myeloma        | nd                  |         |         |                           | 87             |         |
| 33       | isolated anemia         | 0.6                 | 93.0    | 7.0     |                           | 68             |         |
| 34       | LLA-T post therapy      | 1.1                 | 34.0    | 66.0    | MRD T neg                 | 59             |         |
| 35       | LLA-T post therapy      | 1.3                 | 80.0    | 20.0    | MRD T neg                 | 56             |         |
| 36       | LLA-B post therapy      | 10.4                | 24.0    | 76.0    | MRD B neg                 | 4              |         |
| 37       | LLA-B post-therapy      | 1.5                 | 58.0    | 42.0    | MRD B neg                 | 67             |         |
| 38       | LLA-B post therapy      | 0.4                 | 100.0   | 0.0     | MRD B neg                 | 23             |         |
| 39       | Isolated thrombopenia   | 0.5                 | 100.0   | 0.0     |                           | 90             |         |
| 40       | Post hepatic transplant | 1.4                 | 70.0    | 30.0    |                           | 19             |         |
| 41       | Agranulocytosis         | 2.8                 | 100.0   | 0.0     |                           | 36             |         |

**Table S2:** 10-color Antibody panels used for routine analysis**A:** list of antibodies used in routine diagnostics**B:** 10-color panels used in routine AML and MDS diagnostics. Panel 1 is used as a screening panel.

| Table S2                                 |            |              |              |      |       |          |      |        |        |       |
|------------------------------------------|------------|--------------|--------------|------|-------|----------|------|--------|--------|-------|
| A: Antibodies used for routine diagnosis |            |              |              |      |       |          |      |        |        |       |
| Antibody                                 | Clone      | Fluorochrome | Company      |      |       |          |      |        |        |       |
| CD2                                      | MT912      | PE           | Dialine      |      |       |          |      |        |        |       |
| CD3                                      | UCHT1      | AA750        | Immunotech   |      |       |          |      |        |        |       |
| CD4                                      | 13B8.2     | PC5.5        | BC           |      |       |          |      |        |        |       |
| CD7                                      | 8H8.1      | APC700       | BC           |      |       |          |      |        |        |       |
| CD10                                     | ALB1       | APC700       | BC           |      |       |          |      |        |        |       |
| CD11b                                    | BEAR1      | FITC         | BC           |      |       |          |      |        |        |       |
| CD11c                                    | S-HCL-3    | PE           | BD           |      |       |          |      |        |        |       |
| CD13                                     | SJ1D1      | ECD          | BC           |      |       |          |      |        |        |       |
| CD14                                     | RM052      | FITC         | BC           |      |       |          |      |        |        |       |
| CD15                                     | 80H5       | PB           | BC           |      |       |          |      |        |        |       |
| CD16                                     | 3G8        | APC750       | BC           |      |       |          |      |        |        |       |
| CD22                                     | SJ10.1H11  | APC700       | BC           |      |       |          |      |        |        |       |
| CD33                                     | D3H260.251 | PC5.5        | Immunotech   |      |       |          |      |        |        |       |
| CD34                                     | 581        | PC7          | BC           |      |       |          |      |        |        |       |
| CD36                                     | CB38       | FITC         | BD           |      |       |          |      |        |        |       |
| CD42b                                    | HIP1       | FITC         | BD           |      |       |          |      |        |        |       |
| CD45                                     | J33        | KO           | BC           |      |       |          |      |        |        |       |
| CD56                                     | N901       | ECD          | BC           |      |       |          |      |        |        |       |
| CD61                                     | VI-PL2     | PE           | Pharmingen   |      |       |          |      |        |        |       |
| CD64                                     | 22         | APC750       | BC           |      |       |          |      |        |        |       |
| CD71                                     | YDJ1.2.2   | APC750       | BC           |      |       |          |      |        |        |       |
| CD79a                                    | HM47       | APC          | BC           |      |       |          |      |        |        |       |
| CD91                                     | A2MRd2     | PE           | BD           |      |       |          |      |        |        |       |
| CD117                                    | 104D2D1    | APC          | BC           |      |       |          |      |        |        |       |
| CD123                                    | 7G3        | PC7          | BD           |      |       |          |      |        |        |       |
| CD200                                    | MRC OX-104 | PE           | BD           |      |       |          |      |        |        |       |
| CD300                                    | UPH2       | APC          | eBiosciences |      |       |          |      |        |        |       |
| HLA-DR                                   | Immu-357   | PB           | BC           |      |       |          |      |        |        |       |
| TDT                                      | HT-6       | FITC         | Dako         |      |       |          |      |        |        |       |
| MPO                                      | MPO-7      | PE           | Dako         |      |       |          |      |        |        |       |
| Glycophorin                              | JC159      | PE           | Dako         |      |       |          |      |        |        |       |
|                                          |            |              |              |      |       |          |      |        |        |       |
|                                          |            |              |              |      |       |          |      |        |        |       |
|                                          |            |              |              |      |       |          |      |        |        |       |
| B: Panels used for routine diagnosis     |            |              |              |      |       |          |      |        |        |       |
|                                          | FL-1       | FL-2         | FL-3         | FL-4 | FL-5  | FL-6     | FL-7 | FL-8   | FL-9   | FL-10 |
| Panel 1                                  | CD14       | CD19         | CD13         | CD33 | CD34  | CD117    | CD7  | CD16   | HLA-DR | CD45  |
| Panel 2                                  | CD36       | CD2          | CD56         | CD4  | CD34  | CD117    | CD10 | CD64   | CD15   | CD45  |
| Panel 3                                  | CD11b      | CD200        |              | CD33 | CD34  | CD117    | CD19 | CD3    |        | CD45  |
| Panel 4                                  | CD14       | CD91         | CD56         | CD33 | CD34  | CD300    | CD16 | CD64   | HLA-DR | CD45  |
| Panel 5                                  | CD36       | Glycophorin  |              | CD33 | CD34  | CD117    |      | CD71   |        | CD45  |
| Panel 6                                  | CD42b      | CD61         | CD13         | CD33 | CD34  | CD117    |      | CD71   |        | CD45  |
| Panel 7                                  | CD14       | CD11c        | CD56         | CD33 | CD123 | CD300    | CD16 | CD64   | HLA-DR | CD45  |
| Panel 8 ic                               | TDT ic     | MPO ic       | CD3          | CD33 | CD34  | CD79a ic | CD22 | CD3 ic |        | CD45  |

**Table S3:** 20-color panel composition for analysis on the spectral cytometer.

| Table S3 |          |                  |        |         |              |
|----------|----------|------------------|--------|---------|--------------|
|          | Cat#     | Fluorochrome     | Marker | Clone   | Manufacturer |
| 0        |          | Brilliant Buffer |        |         |              |
| 1        | BL329210 | BV421            | CD200  | OX-104  | BD           |
| 2        | R7-20003 | cFluor V450      | CD14   | M5E2    | Cytek        |
| 3        | R7-20011 | cFluor V547      | CD45   | HI30    | Cytek        |
| 4        | BL304136 | BV650            | CD45RA | HI100   | BD           |
| 5        | BL329223 | BV711            | CD64   | 10.1    | BD           |
| 6        | CR-20001 | cFluor™ B515     | CD3    | SK7     | Cytek        |
| 7        | CR-20002 | cFluor™ B532     | CD15   | W6D3    | Cytek        |
| 8        | CR-20003 | cFluor™ BYG575   | CD133  | W6B3C1  | Cytek        |
| 9        | CR-20004 | cFluor™ BYG610   | CD117  | 104D2   | Cytek        |
| 10       | CR-20005 | cFluor™ BYG667   | CD56   | 5.1H11  | Cytek        |
| 11       | CR-20006 | cFluor™ B690     | HLA-DR | L243    | Cytek        |
| 12       | R7-20009 | cFluor™ BYG710   | CD19   | H1B19   | Cytek        |
| 13       | CR-20007 | cFluor BYG750    | CD33   | WM53    | Cytek        |
| 14       | CR-20008 | cFluor BYG781    | CD34   | 581     | Cytek        |
| 15       | CR-20009 | cFluor™ R659     | CD371  | 50C1    | Cytek        |
| 16       | R7-20029 | cFluor™ R668     | CD7    | CD7-6B7 | Cytek        |
| 17       | CR-20010 | cFluor™ R685     | CD16   | 3G8     | Cytek        |
| 18       | R7-20013 | cFluor™ R720     | CD123  | 6H6     | Cytek        |
| 19       | CR-20011 | cFluor™ R780     | CD36   | 5-271   | Cytek        |
| 20       | CR-20012 | cFluor™ R840     | CD38   | HB7     | Cytek        |
| 21       | R7-60008 | ViaDye™ Red      | DEAD   |         | Cytek        |

**Figure S1: Sequential gating strategy for CD34pos HSCP analysis**

**A:** CD34pos HSPC are sequentially gated on TIME/SSC, SSC-H/SSC-A, FSC/SSC and backgated on CD45/SSC. The selected CD34pos HSPC population is then analyzed for the presence of myeloid (CD33pos), and lymphoid (CD19 pos), progenitors. In normal BM samples these two subpopulations show a ratio of approximately 2:1.

**B:** Analysis of a sample with an aberrant myeloid HSPC subpopulation. Analysis of the CD34pos HSPC population (violet) shows loss of the CD19pos subpopulation and presence only of myeloid HSPCs. These cells co-express CD117 and CD7. Whereas CD117 is physiologically co-expressed, CD7 constitutes an aberrant marker, since normal myeloid HSPCs do not express it.

Figure S1

**A: Analysis of CD34pos HSPCs in a BM sample**

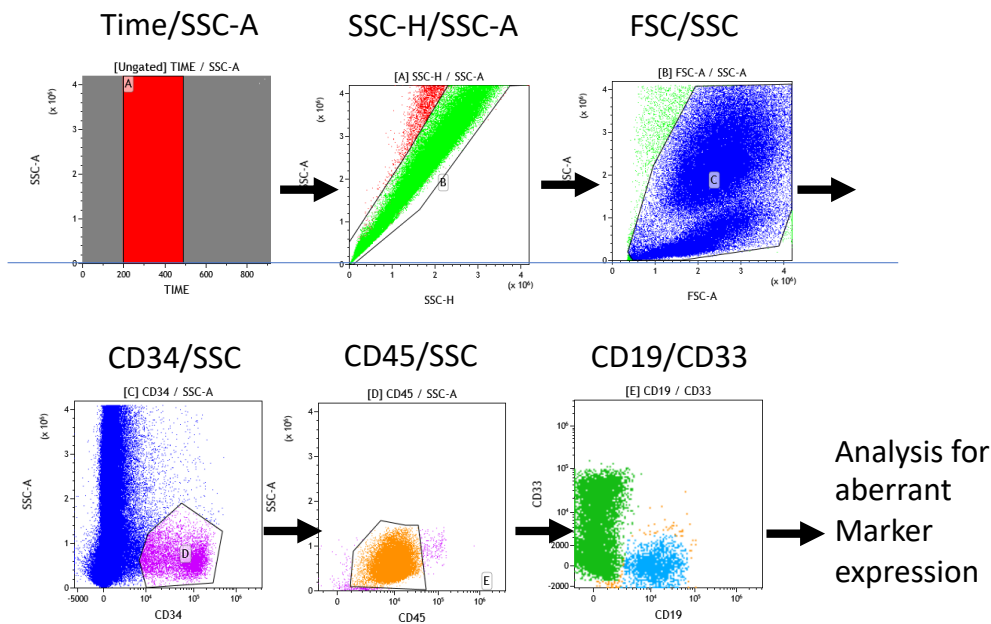

**B: Analysis of leukemic blasts**

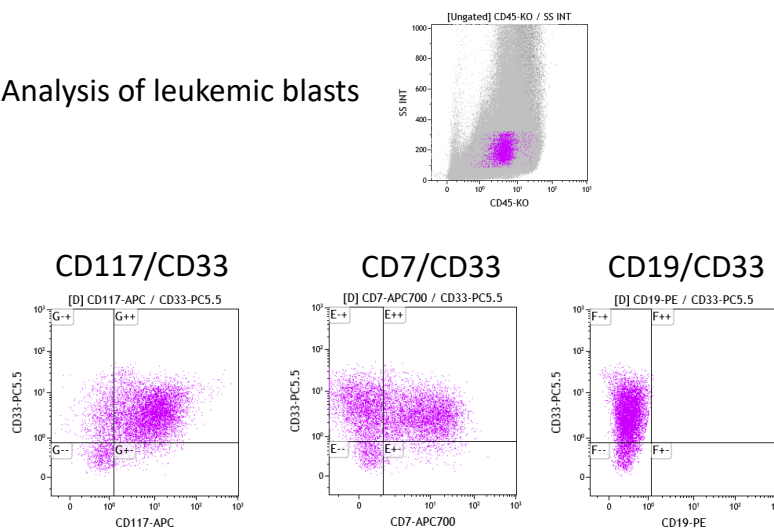

**Figure S2:** Analysis of CD123pos HSPCs.

Analysis of CD34pos HSPCs in CD371/CD123, CD38/CD123 and CD371/CD45RA 2D dotplots shows the CD123pos subpopulation (depicted in blue) in a characteristic position. HSC/MPP are depicted in brown.

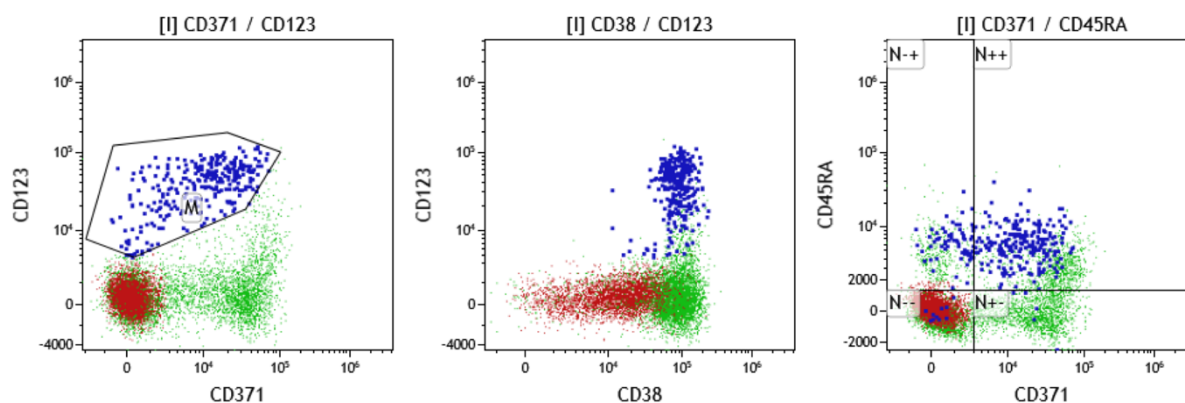

**Figure S3:** t-SNE CUDA analysis of normal BM samples.

Five normal BM samples were analyzed by t-SNE CUDA with  $1 \times 10^6$  cells used for the analysis (perplexity 30, iterations 1000). Results from a typical case are depicted. Comparison of marker expression on the t-SNE plot with expression on 2D plots analyzed with KALUZA allowed the identification and annotation of 24 different populations in normal bone marrow samples. The different populations occupied exactly the same spot in the t-SNE plots from the five patients.

Figure S3

## Identification of 24 different cell populations

- 1 Myeloid cells
- 2 HSPC
- 3 pDC
- 4 B lymphocytes
- 5 B lymphocytes
- 6 Myeloid cells CD200++
- 7 Myeloid cells
- 8 Myeloid precursors; CD16neg CD117pos
- 9 Myeloid cells
- 10 Dead cells + myeloid cells
- 11 T lymphocytes
- 12 Eosinophils ?
- 13 Myeloid cells
- 14 Monocytes
- 15 Myeloid cells
- 16 Myeloid cells
- 17 NK cells
- 18 Myeloid cells CD16+++; apoptotic
- 19 B lymphocytes
- 20 Mast cells → 191 cells = 0.02%
- 21 Plasma cells
- 22 Basophils
- 23 Myeloid cells
- 24 Erythroid cells ?

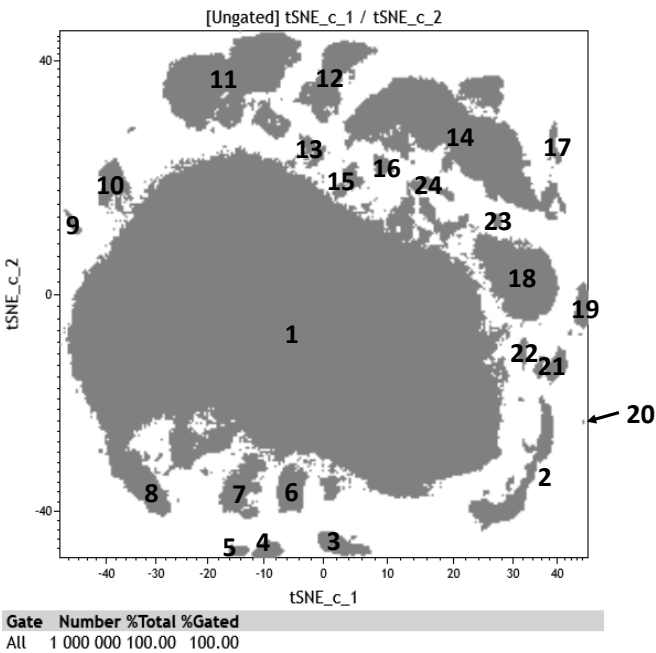

**Figure S4:** t-SNE CUDA analysis of CD34 HSPCs from normal bone marrow samples.

CD34pos HSPCs were gated according to Figure 1 from the five normal bone marrow samples and 4500 cells from each sample were used for t-SNE analysis (perplexity, 100 iterations 1000). Depicted are the t-SNE plots with all 20 parameters as z channel markers.

Figure S4

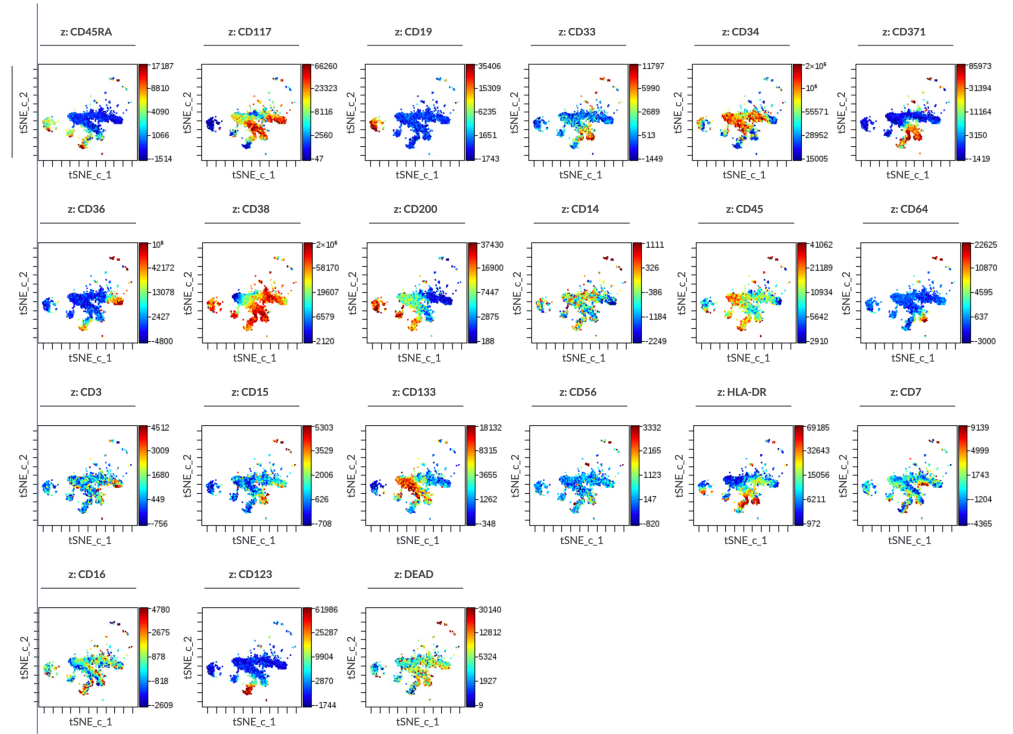

Supplement: s1 [file s1]
